# Supplementary material for: Development of dual-functional catalysis for hydrazine oxidation by an organic p–n bilayer through in situ formation of a silver co-catalyst
Source: Royal Society of Chemistry journal article supplement (doi:10.1039/d1ra07960c), 2022-01-01
Supplement: d1ra07960c1.pdf [file d1ra07960c1.pdf]

## Supporting Information (SI)

### Development of dual-functional catalysis for hydrazine oxidation by organic p-n bilayer through in-situ formation of silver co-catalyst

Mamoru Sato, and Toshiyuki Abe\*

#### *Calculation procedures*

The **faradaic efficiency (F.E.)** was calculated as follows:

- i) During the electrolysis reaction, the amount of charge passed was measured using a coulomb meter. The theoretical amount of formed N<sub>2</sub> (or H<sub>2</sub>) was calculated from the obtained charge amount.
- ii) After conducting the electrolysis reaction, both N<sub>2</sub> and H<sub>2</sub> were quantified by gas chromatography.

Concretely, the *F.E.* value for the formation of N<sub>2</sub> (or H<sub>2</sub>) was estimated according to the following equation:

$$\begin{aligned} F.E. (\%) &= [\text{amount of N}_2 \text{ (or H}_2\text{) evolved}]/[\text{theoretical amount of N}_2 \text{ (or H}_2\text{)}] \times 100 \\ &= [\text{amount of N}_2 \text{ (or H}_2\text{) evolved}]/[(\text{amount of charge passed})/(nF)] \times 100 \end{aligned}$$

where *n* is the number of electrons participating in the evolution of the products (*n* = 4 and 2 for the formation of N<sub>2</sub> and H<sub>2</sub>, respectively) and *F* represents the Faraday's constant ( $9.65 \times 10^4 \text{ C mol}^{-1}$ ).

The **incident photon-to-current conversion efficiency (IPCE)** was estimated according to the following equation:

$$IPCE (\%) = ([I/e]/[W/\varepsilon]) \times 100$$

where *I* (A cm<sup>-2</sup>) is the photocurrent density, *e* (C) denotes the elementary electric charge, *W* (W cm<sup>-2</sup>) is the light intensity, and *ε* is the photon energy of monochromatic light.

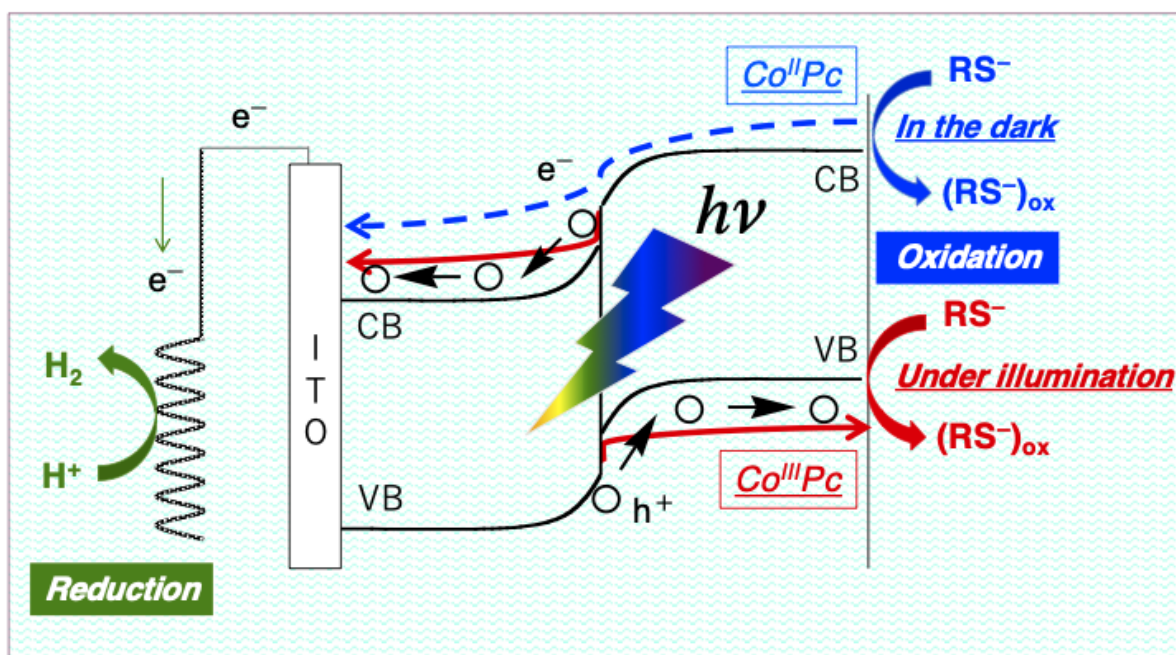

**Scheme S1** Mechanism of the dual-functional catalysis for thiol ( $RS^-$ ) oxidation occurring at PTCBI/CoPc-Nf in the dark and under illumination.

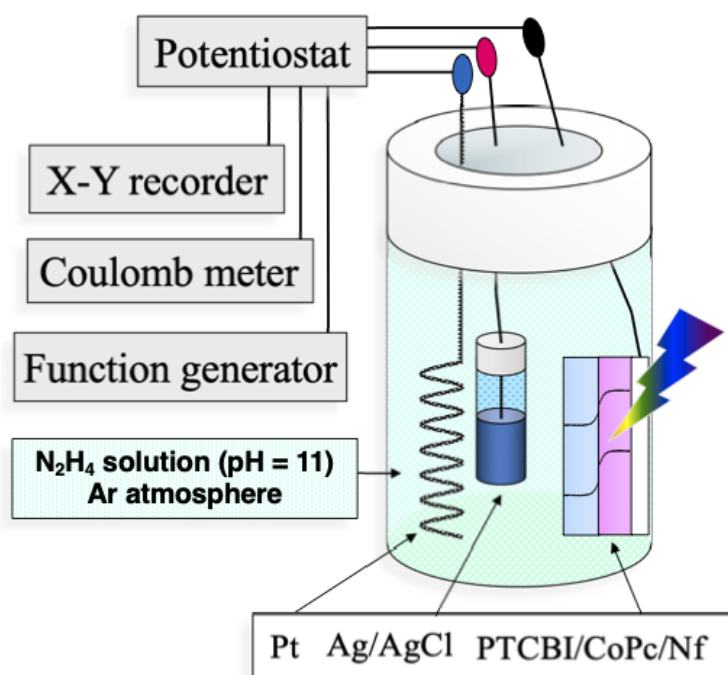

**Scheme S2** Illustration of the photoelectrochemical cell employed for measuring both voltammograms and photocurrents under potentiostatic conditions.

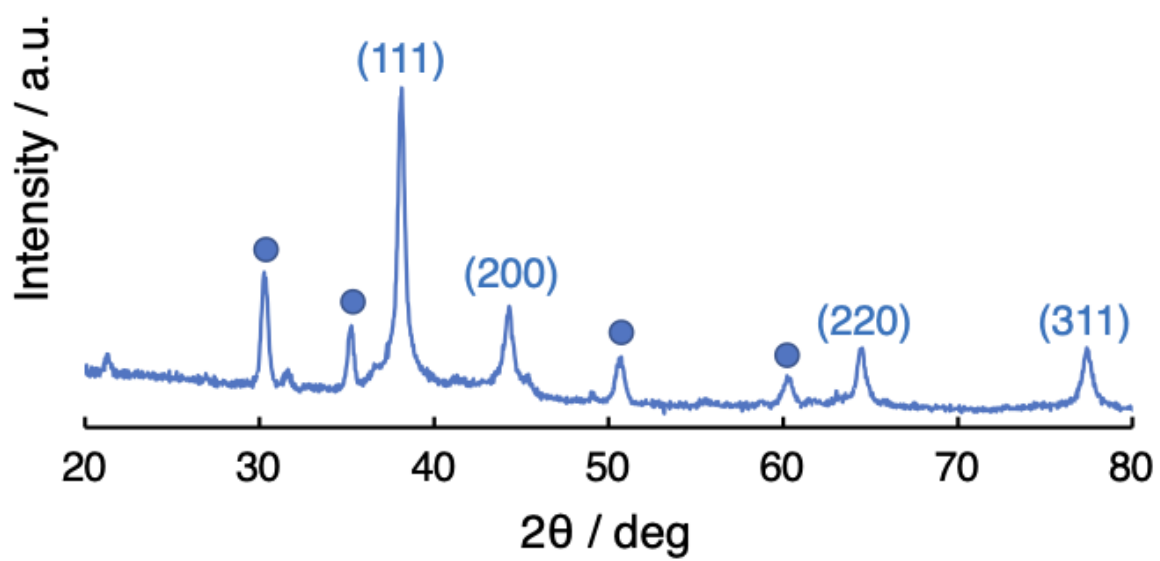

**Fig. S1** XRD pattern of PTCBI/CoPc-Nf[Ag<sub>2</sub>O] measured after Ar purge of the N<sub>2</sub>H<sub>4</sub> solution for 30 min. As for the closed circles, those are consistent with Fig. 2(a).

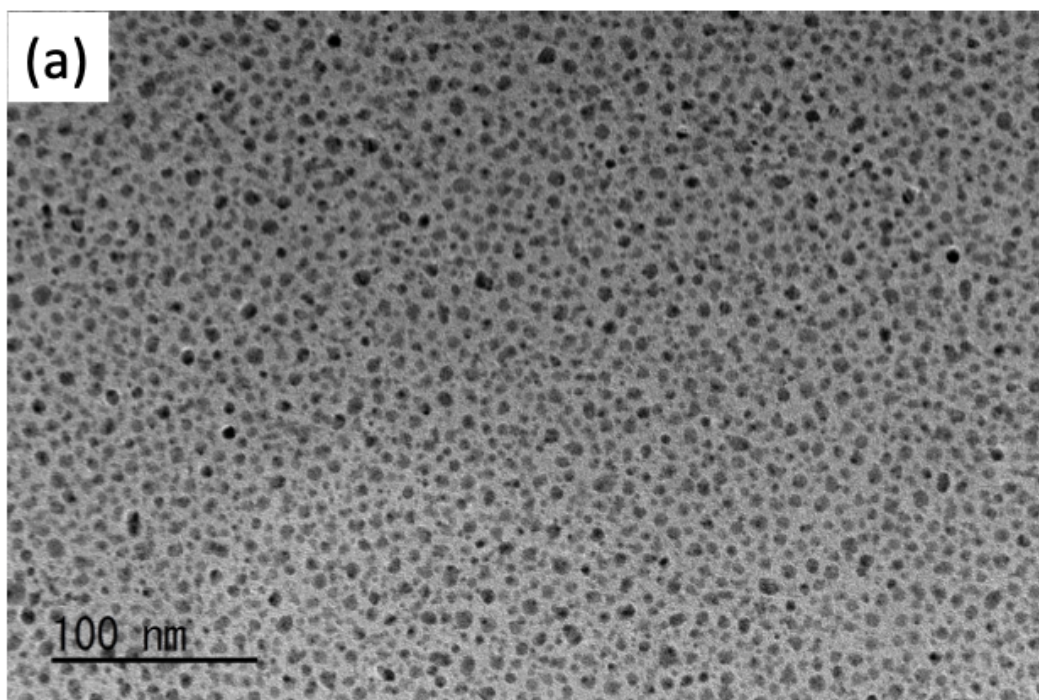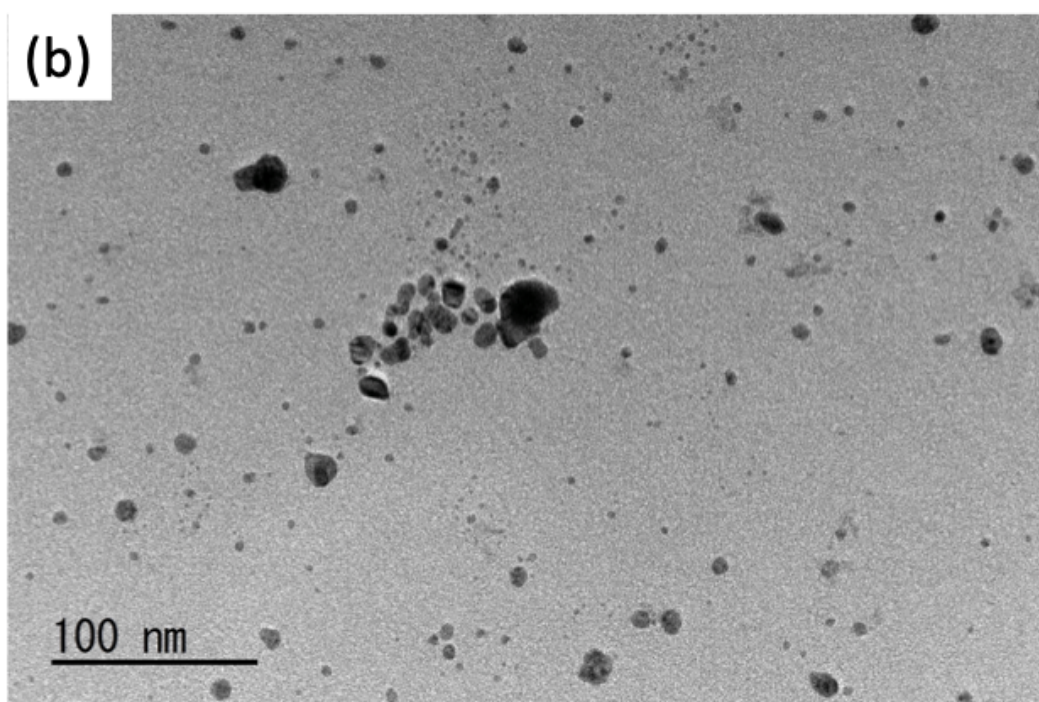

**Fig. S2** TEM images of Ag<sub>2</sub>O dispersed in a Nf membrane. A  $4 \times 10^{-5} \text{ dm}^3$  portion of the suspension, composed of Nf and Ag<sub>2</sub>O (see main text), was cast onto a collodion membrane supported on a copper grid mesh and dried at room temperature.

(a), Ag<sub>2</sub>O sample after drying; (b), the sample exposed to a N<sub>2</sub>H<sub>4</sub> solution under Ar purge (i.e., Ag).

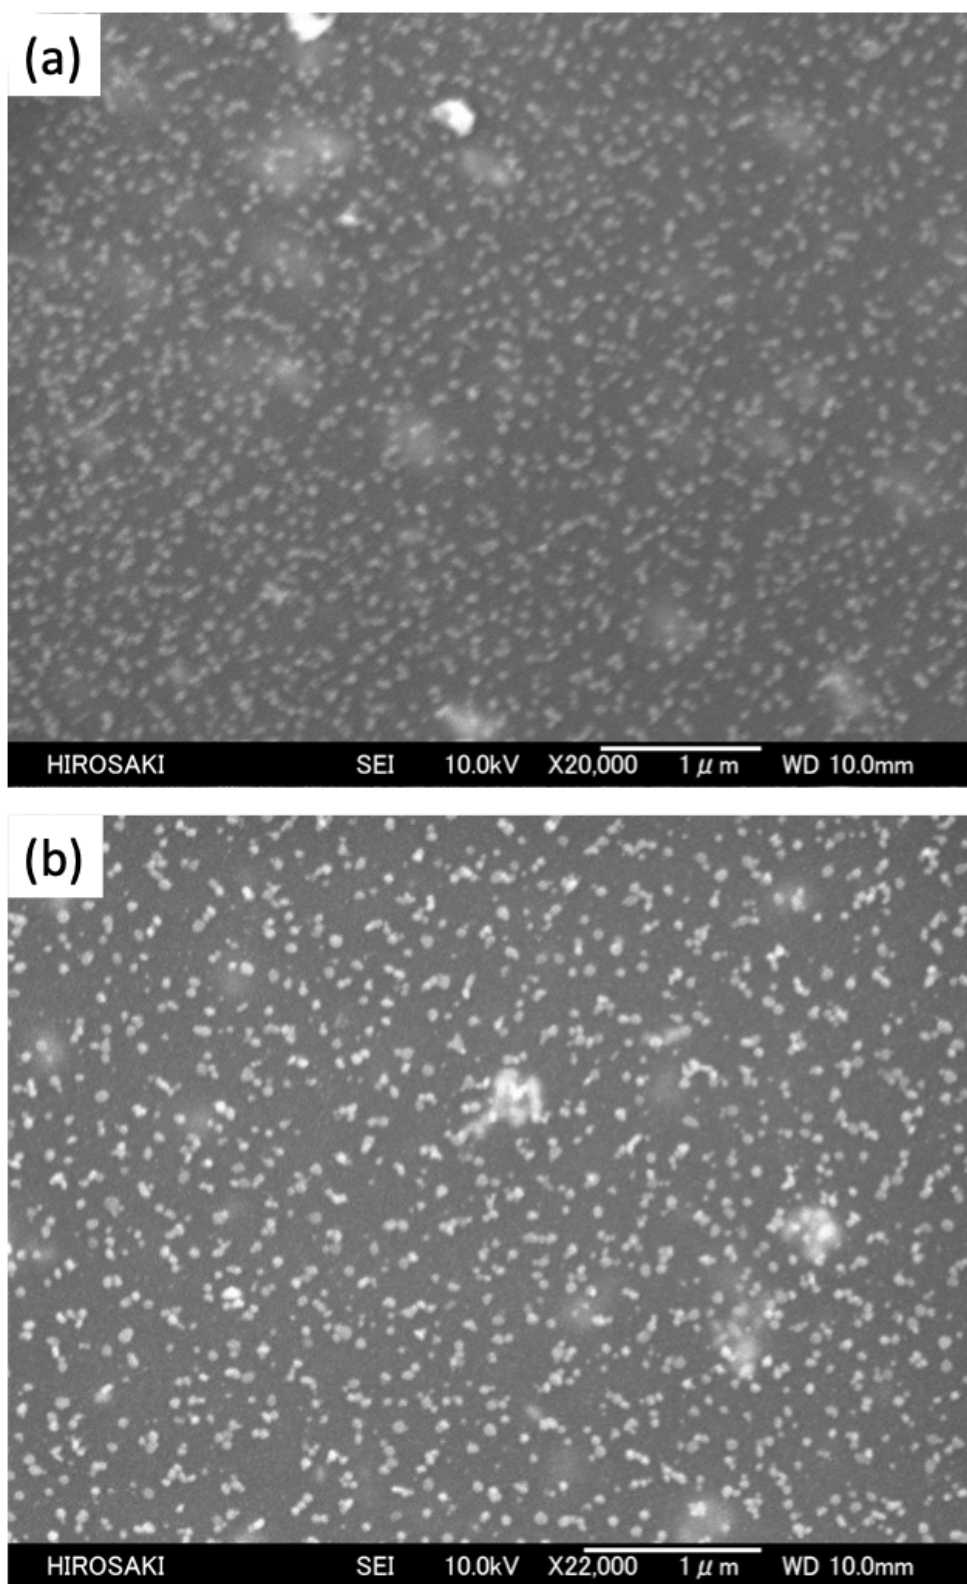

**Fig. S3** SEM images of PTCBI/CoPc-Nf[Ag<sub>2</sub>O].

(a), the sample exposed to a N<sub>2</sub>H<sub>4</sub> solution under Ar purge (i.e., Ag); (b), the sample after the photoelectrolysis.
